# Supplementary material for: Melatonin in Micro-Tom Tomato: Improved Drought Tolerance via the Regulation of the Photosynthetic Apparatus, Membrane Stability, Osmoprotectants, and Root System
Source: MDPI journal article supplement (doi:10.3390/life12111922), 2022-11-18
Supplement: s1 [file s1]

**Table S1: Primers used in this study**

| <b>Gene</b>    | <b>Forward</b>         | <b>Reverse</b>         |
|----------------|------------------------|------------------------|
| <i>SlActin</i> | CTTGTCTGTGACAATGGAAGT  | ATACCCACCATCACACCAGTAT |
| <i>SlPetE</i>  | GTTCCACACAACGTCGTA     | GACAGTAACCTTGCCAACCA   |
| <i>SlPetF</i>  | TTCTCACTCACAATGGCAAC   | CCAGCTCTGTAGTTTACCTT   |
| <i>SlPsbW</i>  | GGCCCTCCTACATAAGGCATC  | GCCCAGTTCCTTCTGTACTCA  |
| <i>SlPsb28</i> | GATTGTGCCTATCCCGTTC    | ATCAAACCTGAATATAGCCAT  |
| <i>SIBADH</i>  | GCTTGGTGGAAAAAGTCCAA   | AAGCAGCCAAAAAGAGTCCA   |
| <i>SISUS3</i>  | TTGGATTTTGAGCCCTTCAC   | AGAGAGGTGCCTGTTGAGGA   |
| <i>SIPOD</i>   | GGCCAATCTTTGACCCTTTA   | AGTCCAGGAGCAAGTCCAGT   |
| <i>SIDHAR1</i> | AGGTGGCTCTTGGACACTTC   | CTTCAGCCTTGGTTTTCTGG   |
| <i>SIGRI</i>   | TTGGTGGAACGTGTGTTCTT   | TCTCATTCACCTCCCATCCA   |
| <i>SIAPX</i>   | TCTGAATTGGGATTTGCTGA   | CGTCTAACGTAGCTGCCAAA   |
| <i>SICAT1</i>  | TGATCGCGAGAAGATACCTG   | CTTCCACGTTTCATGGACAAC  |
| <i>SISOD</i>   | AGAAAGCTGTTGCTGTCCTTA  | CCAGGAGCAAGTCCAGTTATAC |
| <i>SIP5CS</i>  | CCCACACCGATAGCATCATTAC | TCCAAAGCGGAATCCATCAC   |
| <i>SISPS</i>   | GATGAGTGAGATGGGGGAGA   | TCTTGGTCCAAAAGGAATGC   |
| <i>SIT6PS</i>  | TGACAAACAGCAGGCTCATC   | CTTCTTGACTTGGGGCTTTG   |
| <i>SlPsbQ</i>  | CGCTTGAGTACTGTTAGCACCA | AATGGCAAAGTGAAGTCCCT   |
| <i>SlPsbP</i>  | AAAATTATATCACTCCGTGTC  | GTATCTGAGAAGTCATCAGC   |
| <i>SlP5CR</i>  | GGAGCTGGTAAAATGGCTGA   | CTGATCCAGAATGGGCTGTT   |
